# Supplementary material for: Constructing novel NaLiTi3O7/g-C3N4Z-scheme photocatalysts to facilitate the separation of charge carriers and study the hydrogen production performance
Source: Royal Society of Chemistry journal article supplement (doi:10.1039/d3nj01733h), 2023-01-01
Supplement: d3nj01733h1.pdf [file d3nj01733h1.pdf]

**Constructing novel NaLiTi<sub>3</sub>O<sub>7</sub>/g-C<sub>3</sub>N<sub>4</sub> Z-scheme photocatalyst to  
facilitate the separation of charge carriers and the hydrogen  
production performance**

Pei-jin Yan <sup>a</sup>, Lang Yuan <sup>a</sup>, Nan Zhao <sup>a</sup>, Ying Xie <sup>a,\*</sup>, Wei Zhou <sup>b,\*</sup>

<sup>a</sup> Key Laboratory of Functional Inorganic Material Chemistry, Ministry of Education, School of Chemistry and Materials Science, Heilongjiang University, Harbin, 150080, PR China

<sup>b</sup> Shandong Provincial Key Laboratory of Molecular Engineering, School of Chemistry and Chemical Engineering, Qilu University of Technology (Shandong Academy of Sciences), Jinan, Shandong 250353, PR China

\*Corresponding author: Ying Xie

E-mail: xieying@hlju.edu.cn (Dr. Ying Xie).

\*Corresponding author: Wei Zhou

E-mail: wzhou@qlu.edu.cn

## 1.Characterization of photocatalytic samples

The prepared samples were characterized by X-ray powder diffraction (XRD) on a Rigaku D/max 2500 PC powder diffractometer. The scan rate and scan range were 2°/min and 10-80°, respectively. Thermogravimetric analysis (TGA) was performed on a Seiko TG/DTA 7300 instrument. Scanning electron microscopy (SEM) was performed on a Hitachi S-4800 field emission scanning electron microscope with an acceleration voltage of 10kV. Transmission electron microscopy (TEM) and high-resolution transmission electron microscopy (HR-TEM) were performed on a Tecnai F20 transmission electron microscope with an acceleration voltage of 200 kV. FT-IR spectra in the mid-infrared range (400-4000 cm<sup>-1</sup>) were recorded on a Nicolet 5700 FT-IR instrument. X-ray photoelectron spectroscopy (XPS) analysis was performed on a Kratos AXIS-Ultra instrument using monochromatic Al-K $\alpha$  radiation (225 W, 15 mA, 15 kV). The UV-visible diffuse reflectance spectra (UV-DRS) were recorded in the range of 300-800 nm on a UV-Vis spectrometer (U-4100, Hitachi). In this case, BaSO<sub>4</sub> was used as the reflectance standard material. The apparent quantum efficiency (AQE) was measured under illumination of a 300 W Xe lamp with bandpass filter (365, 420 and 500 nm) system. The quantum efficiency is calculated by the following equation:

$$AQE = \frac{2MNAhc}{AIt\lambda} \times 100\%$$

where M is the amount of hydrogen molecules, N<sub>A</sub> is the Avogadro's constant, h is the Planck constant, c is the light velocity, I is the intensity of the light, A is the irradiation area, t is the reaction time, and  $\lambda$  is the wavelength of light.

## 2. Photocatalytic experiment for water splitting

The photocatalytic H<sub>2</sub>-production experiments were performed in an outer irradiation type photoreactor (50 mL quartz glass). A 100 mg catalyst sample was suspended in lactic acid solution (10 vol%). Note that lactic acid is used as a sacrificial electron donor. There was 1 wt% Pt photodeposited on the surface of the catalyst using H<sub>2</sub>PtCl<sub>6</sub> as a precursor. Before the reaction, the mixture is degassed under vacuum to remove CO<sub>2</sub> and O<sub>2</sub>. The released gas was observed only under irradiation and analyzed

using an online gas chromatograph (Techcomp 7900, TCD, Ar carrier). During the reaction, the temperature is maintained at 20°C by a constant temperature cooling circulation pump.

### 3. Photochemical properties test

The Versa STAT 3 electrochemical workstation of Princeton University was used to analyze the photoelectric properties of the sample. Firstly, 50 mg samples were continuously stirred and dispersed in 5 mL ethanol solution for 1 h to achieve uniform dispersion. The dispersion is then evenly sprayed onto the FTO glass using an art spray gun. Finally, the FTO glass was calcined in a tubular furnace for 2 hours under N<sub>2</sub> atmosphere at 350°C, and the heating rate was maintained at 5°C min<sup>-1</sup> to prevent the decline of the sample during the test. The electrochemical workstation is a three-electrode system, the photoanode is sample coated FTO glass, the electrode is platinum plate, the reference electrode is Ag/AgCl, and the electrolyte is Na<sub>2</sub>SO<sub>4</sub> aqueous solution. The electrolyte is purified with nitrogen before use to degas the solution to prevent the presence of air from affecting the test results.

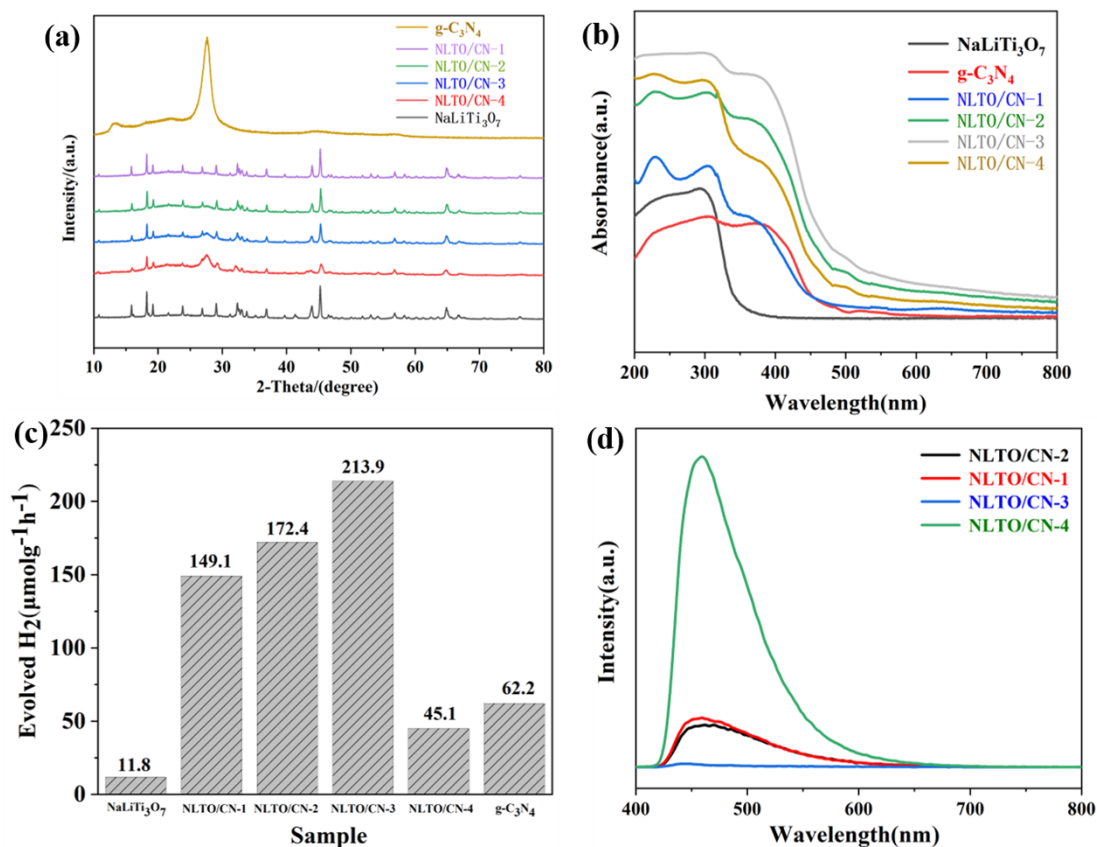

**Figure S1** (a) XRD patterns of pure  $\text{NaLiTi}_3\text{O}_7$ , pure  $\text{g-C}_3\text{N}_4$ , NLTO/CN-1, NLTO/CN-2, NLTO/CN-3, and NLTO/CN-4 (b) UV-vis DRS diagram of pure  $\text{NaLiTi}_3\text{O}_7$ , pure  $\text{g-C}_3\text{N}_4$ , NLTO/CN-1, NLTO/CN-2, NLTO/CN-3, and NLTO/CN-4 (c) Hydrogen production performance of pure  $\text{NaLiTi}_3\text{O}_7$ , pure  $\text{g-C}_3\text{N}_4$ , NLTO/CN-1, NLTO/CN-2, NLTO/CN-3, and NLTO/CN-4 (d) Fluorescence properties of NLTO/CN-1, NLTO/CN-2, NLTO/CN-3, and NLTO/CN-4
